# INFOGRAPHICS IN ANESTHESIOLOGY

Complex Information for Anesthesiologists Presented Quickly and Clearly

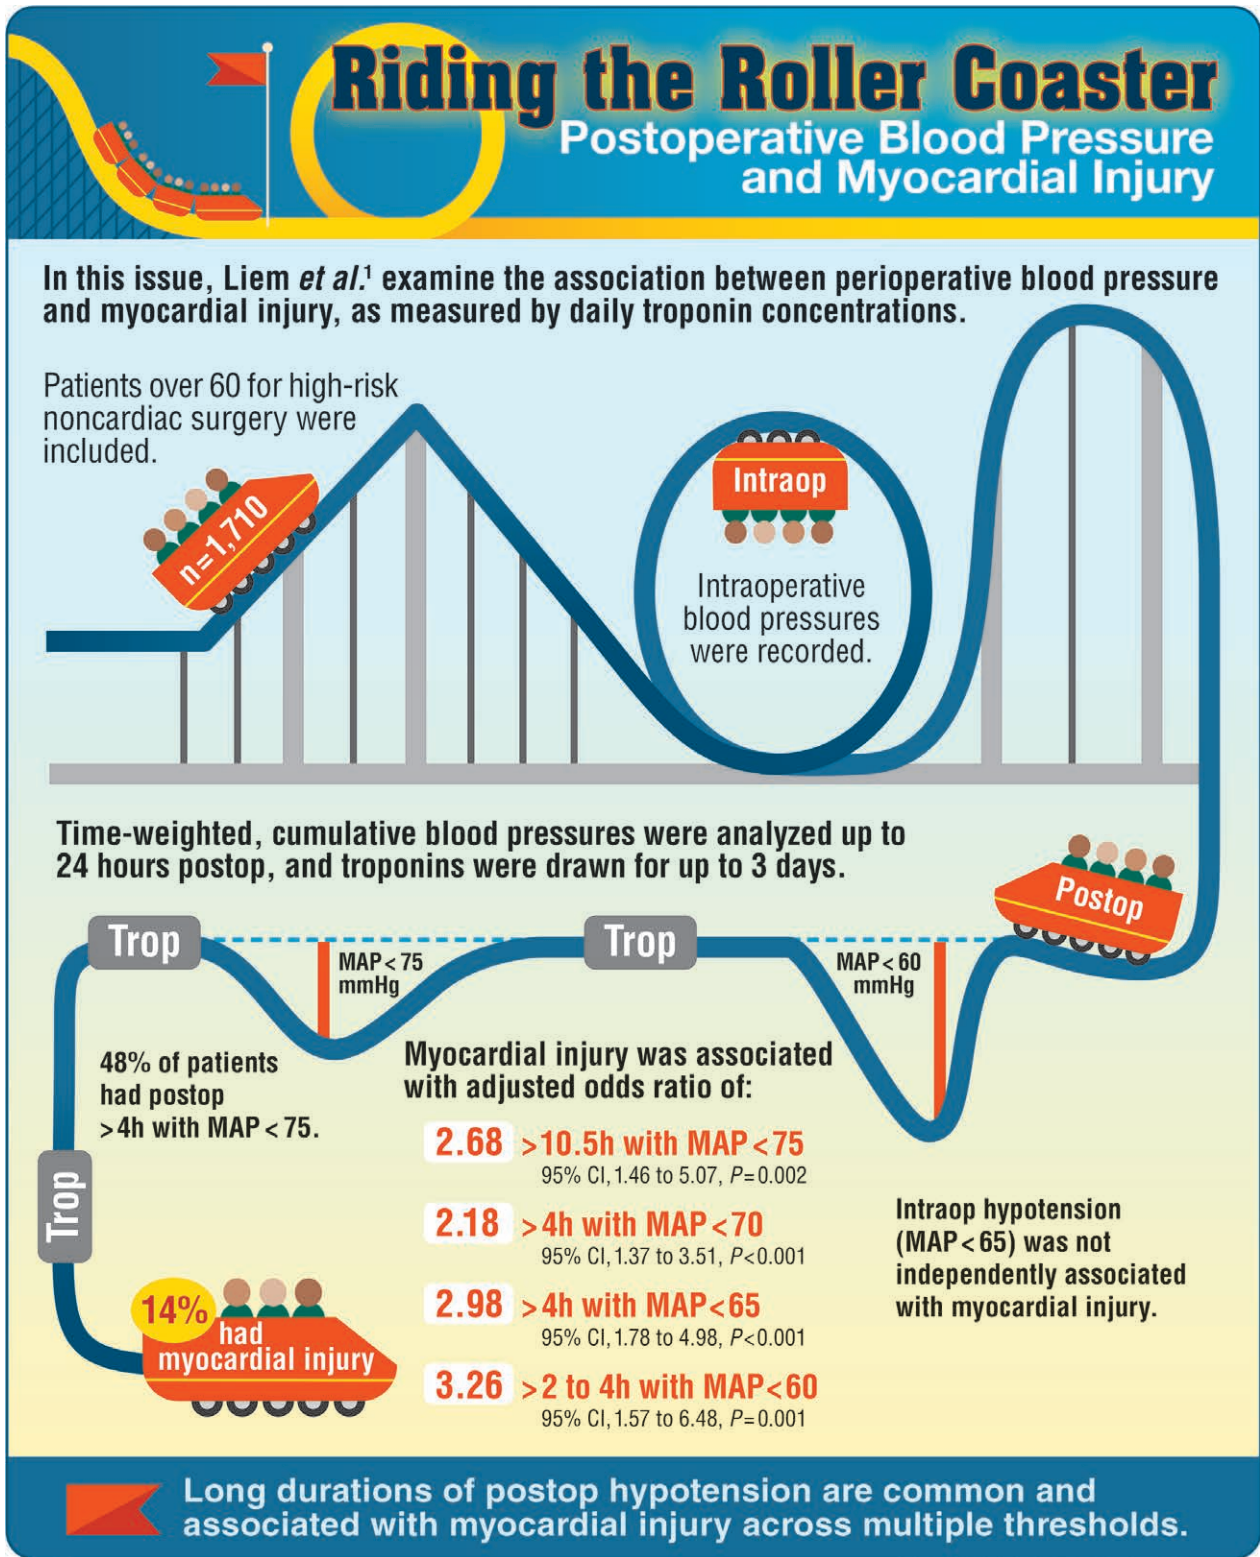

Downloaded from <http://esa2.silverchair.com/anesthesiology/article-pdf/133/3/A1915/15189/20200900-0-00005.pdf> by guest on 18 April 2024

Intraop, intraoperative; MAP, mean arterial pressure; postop, postoperative; trop, troponin.

Infographic created by Jonathan P. Wanderer, Vanderbilt University Medical Center, and James P. Rathmell, Brigham and Women's Health Care/Harvard Medical School. Illustration by Annemarie Johnson, Vivo Visuals. Address correspondence to Dr. Wanderer: [jon.wanderer@vumc.org](mailto:jon.wanderer@vumc.org).

1. Liem VGB, Hoeks SE, Mol KHJM, Potters JW, Grüne F, Stolker RJ, van Lier F: Postoperative hypotension after noncardiac surgery and the association with myocardial injury. *ANESTHESIOLOGY* 2020; 133:510–22
